# Supplementary material for: Functional nanoparticle-driven self-assembled diblock copolymer hybrid nano-patterns
Source: Royal Society of Chemistry journal article supplement (doi:10.1039/d2py00121g), 2022-01-01
Supplement: d2py00121g1.pdf [file d2py00121g1.pdf]

## Supporting Information

### Functional Nanoparticles-driven Self-assembled Diblock Copolymer Hybrid Nano-Patterns

*Coste Mawélé Loudy*<sup>1,2</sup>, *Joachim Allouche*<sup>1</sup>, *Antoine Bousquet*<sup>1</sup>,  
*Laurent Billon*<sup>1,2\*</sup>, *Hervé Martinez*<sup>1\*</sup>

<sup>1</sup> Université de Pau et des Pays de l'Adour, E2S UPPA, IPREM-UMR 5254 Hélioparc, 2 avenue  
Président Angot, 64053 Pau, France

<sup>2</sup> Bio-inspired Materials Group: Functionalities & Self-assembly, E2S UPPA, 2 avenue  
Président Angot, 64053 Pau, France

This supporting information contains

-Total number of pages: **6 pages**

-Total number of figures: **5 figures**

SEM, TGA, UV-visible spectra and SAXS pattern of the block copolymers and NPs  
used in this work

-Total number of schemes: **7 Tables**

XPS data of the block copolymers and NPs used in this work

Values of the dispersion, polar and hydrogen bonding parameters for the calcul of the  
interaction parameter  $\chi_{12}$

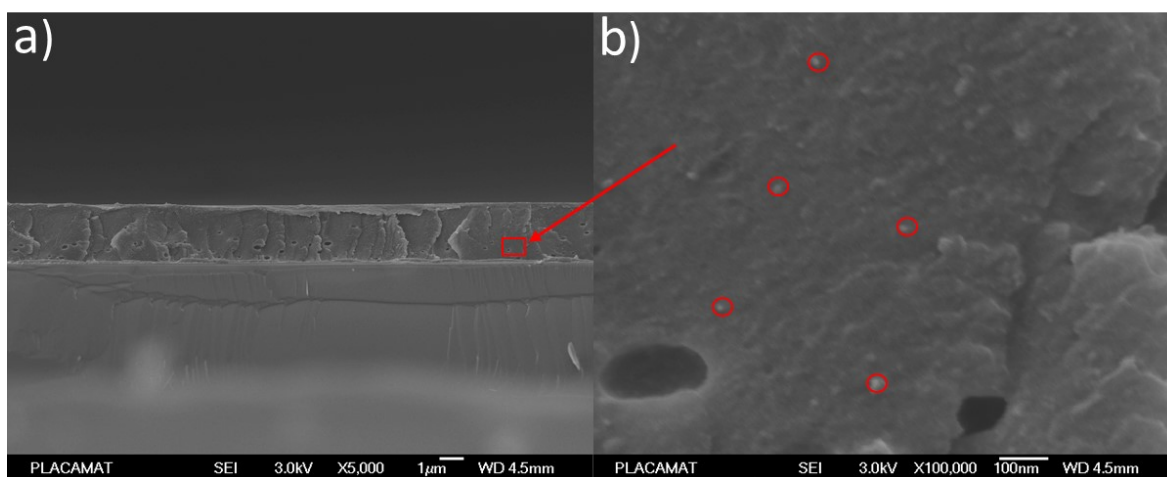

**Figure SI1.** a) SEM images of the section of the hybrid film with GNPs@PS 31 v%. b) is a magnification image of a)

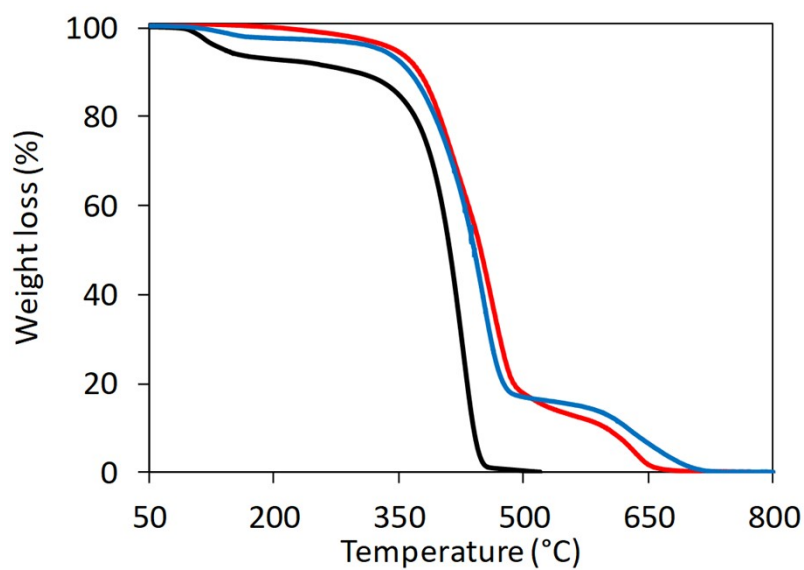

**Figure SI2.** TGA thermograms of PS macro-initiator (black curve), PS-*b*-PVBN<sub>3</sub> (blue curve) and PS-*b*-PVBEG (red curve).

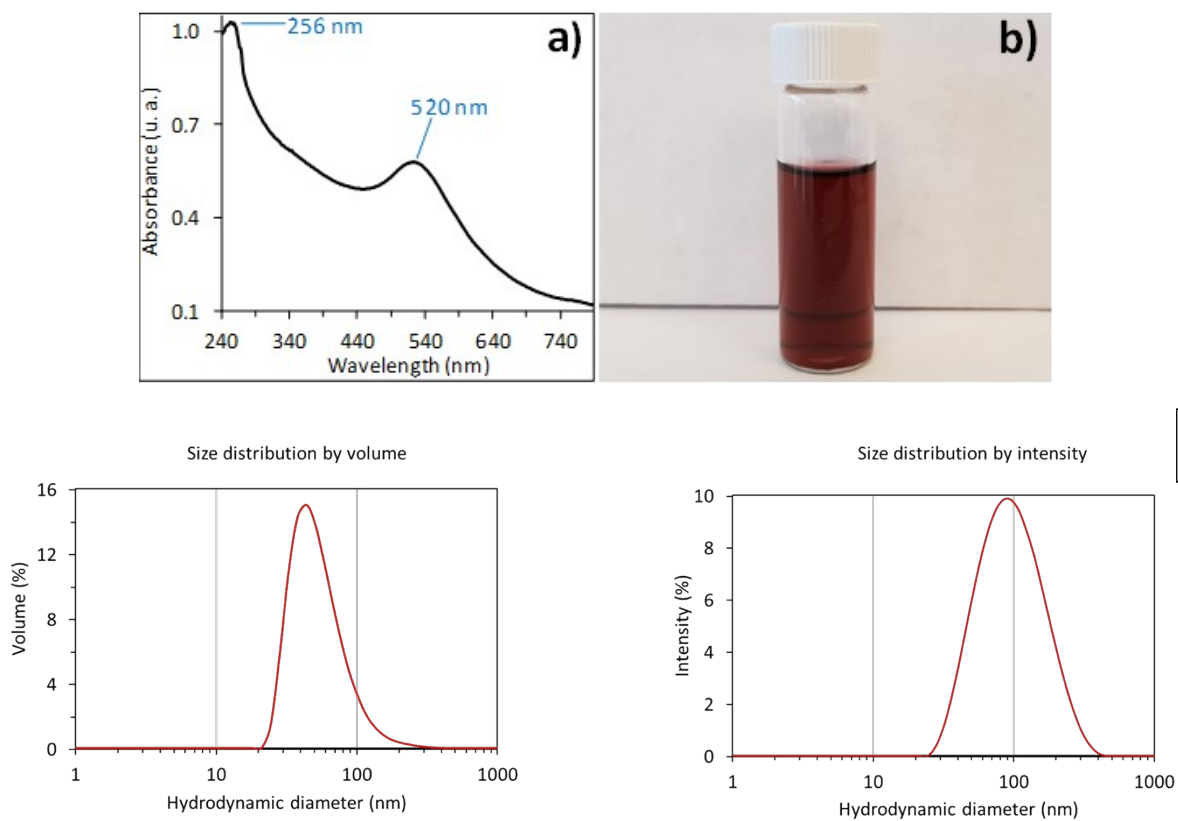

**Figure S13.** (a) UV-vis spectrum, (b) photo of a suspension and (c) size distributions by Dynamic Light Scattering of polystyrene-thiol-capped gold nanoparticles.

$$Grafting\ density = \left[ \frac{\left( \frac{W_{\%shell}}{100 - W_{\%shell}} \right) \times 100 - W_{\%core}}{M_{Ligand} \times S \times 100} \right] 10^6 [\mu mol/m^2]$$

Equation SI1

Where  $M_{Ligand}$  is the molar mass of polystyrene thiol PS-thiol (6000 g.mol<sup>-1</sup>),  $S$  is the specific surface area of gold nanoparticles (62 m<sup>2</sup>.g<sup>-1</sup>, calculated from the hypothesis of a non-porous smooth spherical nanoparticle), and  $W\%$  the weight loss percentage of the gold core and PS shell, due to its degradation ( $_{shell}$ ) and to the NPs ( $W\%_{core}$ ), *i.e.* before grafting ( $\approx 3\%$ ). The specific surface area required for this equation, if not calculated by Brunauer–Emmett–Teller (BET) analysis, can also be calculated from Gao equation described below:

$$Surface\ area\ (S) = \frac{\sigma}{d\rho} \quad \text{Equation SI2}$$

where  $\sigma$  is the shape factor of the nanoparticles, equals to 6 for spherical nanoparticles;  $d$  is the diameter of the nanoparticles ( $\approx 5$  nm) and  $\rho$  is the density of the material (NP) and is equal to 19.32 g/cm<sup>3</sup>.

**Table SI1.** XPS data of PS-*b*-PVBC film

| Orbitals | Components               | BE (eV) | FWHM (eV) | At. Conc. (%) |
|----------|--------------------------|---------|-----------|---------------|
| C 1s     | C=C                      | 284.5   | 0.9       | 67.1          |
|          | C-C/C-H                  | 285.0   | 0.9       | 22.3          |
|          | C-Cl                     | 286.6   | 0.9       | 1.9           |
|          | $\pi$ - $\pi^*$          | 291     | 0.9       | 3.5           |
| Cl 2p    | Cl 2p <sub>3/2-1/2</sub> | 200/202 | 1.1       | 1.7           |

BE: Binding Energy FWHM: Full Width at Half Maximum  
At. Conc.: Atomic Concentration

**Table SI2.** XPS data of PS-*b*-PVBN<sub>3</sub> film

| Orbitals    | Components          | BE (eV) | FWHM (eV) | At. Conc. (%) |
|-------------|---------------------|---------|-----------|---------------|
| <i>C 1s</i> | C=C (cycle)         | 284.5   | 0.9       | 67.5          |
|             | C-C/C-H             | 285.0   | 0.9       | 24.2          |
|             | C-N                 | 286.2   | 1.1       | 2.6           |
|             | $\pi$ - $\pi^*$     | 291     | 1.3       | 3.7           |
| <i>N 1s</i> | N <sup>-</sup> /N-R | 400.5   | 1.1       | 1.4           |
|             | N <sup>+</sup>      | 404.3   | 1.1       | 0.7           |

**Table SI3.** XPS data of PS-*b*-PVBEg film

| Orbitals    | Components      | BE (eV)     | FWHM (eV) | At. Conc. (%) |
|-------------|-----------------|-------------|-----------|---------------|
| <i>C 1s</i> | C=C             | 284.5       | 1         | 51.1          |
|             | C-C/C-H         | 285.0       | 1.0       | 17.2          |
|             | C-N/C-O         | 286.6       | 1.0       | 14.6          |
|             | $\pi$ - $\pi^*$ | 291         | 1.6       | 1.8           |
| <i>N 1s</i> | N (Triazole)    | 399.6/401.7 | 1.2-1.2   | 2.9           |
| <i>O 1s</i> | O-C             | 532.8       | 1.7       | 12.4          |

**Table SI4.** Values of the dispersion, polar and hydrogen bonding parameters.

| Polymer           | $\delta_d$ (MPa <sup>1/2</sup> ) | $\delta_p$ (MPa <sup>1/2</sup> ) | $\delta_h$ (MPa <sup>1/2</sup> ) | $\delta_{tot}$ (MPa <sup>1/2</sup> ) |
|-------------------|----------------------------------|----------------------------------|----------------------------------|--------------------------------------|
| PS                | 17.6                             | 18.5                             | 19.1                             | 17.7                                 |
| PVBC              | 2.3                              | 5                                | 11                               | 7                                    |
| PVBN <sub>3</sub> | 3                                | 3.7                              | 9.5                              | 5.5                                  |
| PVBEG             | 18                               | 19.5                             | 23.9                             | 19.8                                 |

Since Flory Huggins interaction parameters ( $\chi_{12}$ ) between PS and PVBN<sub>3</sub> or PVBEG are not available, they were calculated from pure component data. First, Hansen Solubility Parameters (HSPs) were determined using HSPiP software (5<sup>th</sup> edition 4.2.02). Then the relation described by Lindvig *et al.*<sup>63</sup> was used (Equation 2). This formula gives the Flory-Huggins interaction parameters using HSPs that combine the contribution due to dispersion (van der Waals,  $\delta_d$ ), the contribution due to polar forces ( $\delta_p$ ) and the contribution due to hydrogen-bonding forces ( $\delta_h$ ). The values of the dispersion, polar and hydrogen bonding parameters are reported in Table SI4. Using  $\alpha = 1$  in equation 2 and HSP parameters reported in Table SI4, the Flory-Huggins parameters ( $\chi_{12}$ ) in PS-*b*-PVBC, PS-*b*-PVBN<sub>3</sub> and PS-*b*-PVBEG were calculated and were equal to 0.11, 1.27 and 0.28, respectively.

$$\chi_{12} = \alpha \frac{V_1}{RT} \left[ (\delta_{d1} - \delta_{d2})^2 + 0.25(\delta_{p1} - \delta_{p2})^2 + 0.25(\delta_{h1} - \delta_{h2})^2 \right] : \text{Equation 2}$$

$V_1$  is the molar volume,  $R$  the gas constant,  $T$  the absolute temperature,  $\delta_d$  van der Waals contribution,  $\delta_p$  the contribution due to polar forces and  $\delta_h$  the contribution due to hydrogen-bonding forces,  $\alpha$  is a constant equal to 1.

**Table SI5.** XPS data of PS-*b*-PVBEG film containing 8 v% of polystyrene-capped gold nanoparticles

| Orbitals | Components               | BE (eV)     | FWHM (eV) | At. Conc. (%) |
|----------|--------------------------|-------------|-----------|---------------|
| Au 4f    | Au 4f <sub>7/2-5/2</sub> | 83.8–87.7   | 1.1       | 0.3           |
|          | C=C                      | 284.5       | 1.0       | 55.9          |
| C 1s     | C–C/C–H                  | 285.0       | 1.0       | 21.0          |
|          | C–N/C–O                  | 286.2       | 1.2       | 8.4           |
|          | $\pi$ - $\pi^*$          | 291.0       | 1.7       | 2.4           |
| N 1s     | N Triazole               | 399.5/401.8 | 2.2       | 1.4           |
| O 1s     | O–C                      | 532.7       | 1.5       | 7.0           |

**Table SI6.** XPS data of PS-*b*-PVBEG film containing 19 v% of polystyrene-capped gold nanoparticles

| Orbitals | Components               | BE (eV)     | FWHM (eV) | At. Conc. (%) |
|----------|--------------------------|-------------|-----------|---------------|
| Au 4f    | Au 4f <sub>7/2-5/2</sub> | 84–87.5     | 1.1       | 0.8           |
|          | C=C                      | 284.5       | 0.9       | 61.9          |
| C 1s     | C–C/C–H                  | 285.0       | 0.9       | 21.6          |
|          | C–N/C–O                  | 286.2       | 1.3       | 5.5           |
|          | $\pi$ - $\pi^*$          | 291         | 1.3       | 4.3           |
| N 1s     | N (Triazole)             | 399.5/401.8 | 1.1       | 1.1           |
| O 1s     | O–C                      | 532.9       | 1.7       | 4.7           |

**Table SI7.** XPS data of PS-*b*-PVBEG film containing 31 v% of polystyrene-capped gold nanoparticles

| Orbitals | Components               | BE (eV)     | FWHM (eV) | At. Conc. (%) |
|----------|--------------------------|-------------|-----------|---------------|
| Au 4f    | Au 4f <sub>7/2-5/2</sub> | 83.8–87.7   | 1.38      | 1.1           |
|          | C=C                      | 284.5       | 1         | 65.6          |
| C 1s     | C–C/C–H                  | 285.0       | 1         | 19.8          |
|          | C–N/C–O                  | 286.4       | 1.4       | 2.3           |
|          | $\pi$ - $\pi^*$          | 291         | 1.5       | 5.1           |
| N 1s     | N (Triazole)             | 399.5/401.7 | 1.3       | 0.8           |
| O 1s     | O–C                      | 532.6       | 1.5       | 2.8           |

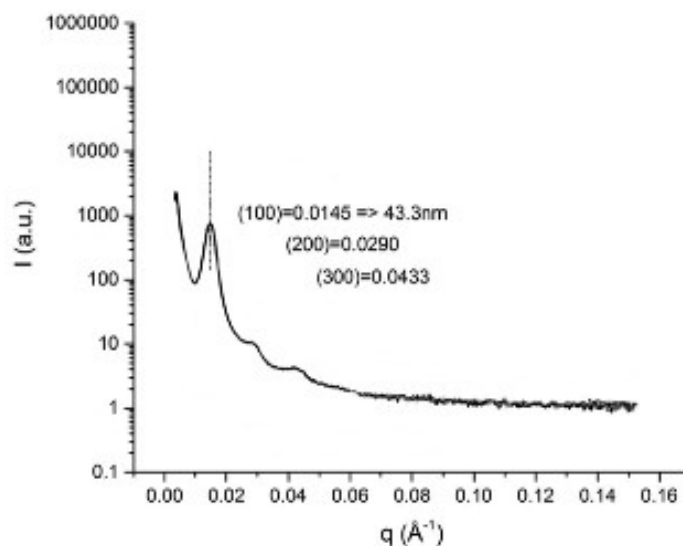

**Figure SI4.** SAXS pattern of the PS-*b*-PVBEG.

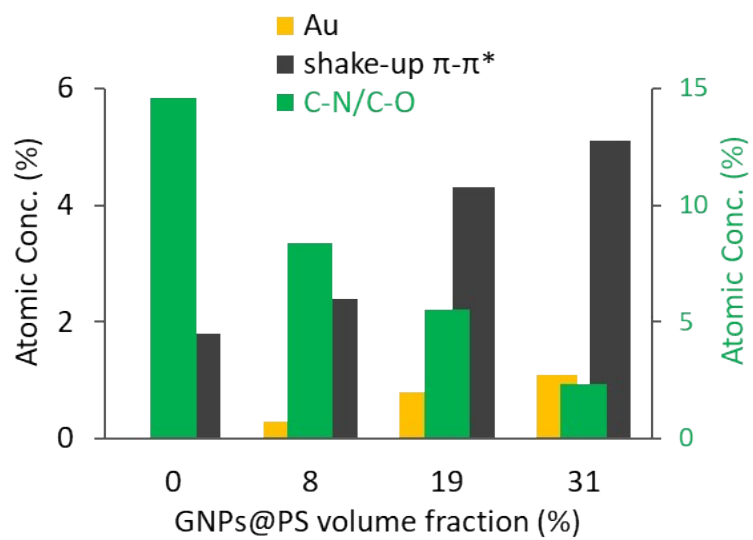

**Figure SI5.** An overview of the evolution of atomic composition the constituents of the hybrid film with the addition of GNPs@PS
